# Supplementary material for: Nearest-Neighbor Interactions and Their Influence on the Structural Aspects of Dipeptides
Source: Hindawi journal article supplement (doi:10.1155/2013/939865), 2013-01-01
Supplement: f1 [file 939865.f1.pdf]

**Supporting information**

# **Nearest-neighbor interactions and their influence on the structural aspects of dipeptides**

**Gunajyoti Das and Shilpi Mandal**

*Department of Chemistry, North-Eastern Hill University,  
Shillong-793022, Meghalaya, India*

\* Author to whom correspondence should be addressed [guna\\_das@yahoo.co.in](mailto:guna_das@yahoo.co.in) Phone: +91-9863334018

## **Contents:**

1. Cartesian coordinates of optimized structures of the dipeptides at b3lyp/6-311++g(d,p) in gas and aqueous phase.

# Sec-Val (gas phase)

| Center<br>Number | Atomic<br>Number | Atomic<br>Type | Coordinates (Angstroms) |           |           |
|------------------|------------------|----------------|-------------------------|-----------|-----------|
|                  |                  |                | X                       | Y         | Z         |
| 1                | 6                | 0              | 3.258975                | 0.686124  | -0.768605 |
| 2                | 1                | 0              | 4.006059                | 0.088829  | -1.299124 |
| 3                | 6                | 0              | 2.117627                | -0.307921 | -0.420298 |
| 4                | 1                | 0              | 1.676058                | -0.661684 | -1.356708 |
| 5                | 6                | 0              | 2.692290                | -1.562955 | 0.242801  |
| 6                | 8                | 0              | 3.595984                | -2.208393 | -0.225428 |
| 7                | 7                | 0              | 1.033995                | 0.295123  | 0.326645  |
| 8                | 7                | 0              | -0.678010               | 1.804510  | 1.767778  |
| 9                | 1                | 0              | -0.650945               | 2.669050  | 1.234124  |
| 10               | 6                | 0              | -1.278805               | 0.712594  | 0.987274  |
| 11               | 1                | 0              | -1.457260               | -0.112954 | 1.685671  |
| 12               | 6                | 0              | -2.608041               | 1.070138  | 0.310104  |
| 13               | 6                | 0              | -0.267570               | 0.165894  | -0.039254 |
| 14               | 1                | 0              | -3.266062               | 1.548609  | 1.033509  |
| 15               | 1                | 0              | -2.446819               | 1.749627  | -0.527567 |
| 16               | 8                | 0              | -0.637264               | -0.361512 | -1.079231 |
| 17               | 1                | 0              | -4.825585               | -0.222326 | 0.370010  |
| 18               | 1                | 0              | -1.209872               | 1.983622  | 2.612467  |
| 19               | 1                | 0              | 1.199597                | 0.736109  | 1.221737  |
| 20               | 8                | 0              | 2.089309                | -1.889600 | 1.408456  |
| 21               | 1                | 0              | 2.511044                | -2.704076 | 1.723304  |
| 22               | 34               | 0              | -3.592876               | -0.516967 | -0.389389 |
| 23               | 6                | 0              | 2.754509                | 1.784662  | -1.710784 |
| 24               | 6                | 0              | 3.923186                | 1.277939  | 0.482692  |
| 25               | 1                | 0              | 2.321215                | 1.362828  | -2.621543 |
| 26               | 1                | 0              | 1.989227                | 2.399642  | -1.228735 |
| 27               | 1                | 0              | 3.577213                | 2.443316  | -2.001962 |
| 28               | 1                | 0              | 4.767401                | 1.911176  | 0.198337  |
| 29               | 1                | 0              | 3.228919                | 1.904694  | 1.052400  |
| 30               | 1                | 0              | 4.308437                | 0.500184  | 1.148379  |

# Sec-Val (aqueous phase)

| Center<br>Number | Atomic<br>Number | Atomic<br>Type | Coordinates (Angstroms) |           |           |
|------------------|------------------|----------------|-------------------------|-----------|-----------|
|                  |                  |                | X                       | Y         | Z         |
| 1                | 6                | 0              | 3.258707                | 0.702861  | -0.783507 |
| 2                | 1                | 0              | 4.015650                | 0.114970  | -1.310544 |
| 3                | 6                | 0              | 2.127311                | -0.307810 | -0.442295 |
| 4                | 1                | 0              | 1.716226                | -0.683307 | -1.382706 |
| 5                | 6                | 0              | 2.710733                | -1.543933 | 0.249295  |
| 6                | 8                | 0              | 3.551928                | -2.247218 | -0.263699 |
| 7                | 7                | 0              | 1.029946                | 0.299710  | 0.280504  |
| 8                | 7                | 0              | -0.643209               | 1.872186  | 1.644221  |
| 9                | 1                | 0              | -0.635904               | 2.695528  | 1.047615  |
| 10               | 6                | 0              | -1.267920               | 0.730372  | 0.965863  |
| 11               | 1                | 0              | -1.493359               | -0.014440 | 1.737108  |

|    |    |   |           |           |           |
|----|----|---|-----------|-----------|-----------|
| 12 | 6  | 0 | -2.572663 | 1.091423  | 0.241832  |
| 13 | 6  | 0 | -0.268068 | 0.040830  | 0.019269  |
| 14 | 1  | 0 | -3.219582 | 1.634407  | 0.926814  |
| 15 | 1  | 0 | -2.374697 | 1.714642  | -0.630419 |
| 16 | 8  | 0 | -0.652699 | -0.709954 | -0.879036 |
| 17 | 1  | 0 | -4.909304 | 0.010649  | 0.167175  |
| 18 | 1  | 0 | -1.160156 | 2.114310  | 2.482705  |
| 19 | 1  | 0 | 1.198287  | 0.922550  | 1.062117  |
| 20 | 8  | 0 | 2.208845  | -1.777141 | 1.472325  |
| 21 | 1  | 0 | 2.633777  | -2.575488 | 1.826489  |
| 22 | 34 | 0 | -3.627925 | -0.493318 | -0.362789 |
| 23 | 6  | 0 | 2.745811  | 1.789458  | -1.735878 |
| 24 | 6  | 0 | 3.912347  | 1.309672  | 0.466603  |
| 25 | 1  | 0 | 2.324394  | 1.354443  | -2.646382 |
| 26 | 1  | 0 | 1.973236  | 2.401532  | -1.262436 |
| 27 | 1  | 0 | 3.565576  | 2.451586  | -2.026202 |
| 28 | 1  | 0 | 4.753037  | 1.943673  | 0.174814  |
| 29 | 1  | 0 | 3.215233  | 1.939731  | 1.028353  |
| 30 | 1  | 0 | 4.297748  | 0.542011  | 1.143445  |

# Sec-Leu (gas phase)

| Center<br>Number | Atomic<br>Number | Atomic<br>Type | Coordinates (Angstroms) |           |           |
|------------------|------------------|----------------|-------------------------|-----------|-----------|
|                  |                  |                | X                       | Y         | Z         |
| 1                | 6                | 0              | 3.228218                | 0.044077  | 0.096918  |
| 2                | 1                | 0              | 4.034786                | -0.650984 | -0.146225 |
| 3                | 6                | 0              | 1.892650                | -0.693969 | -0.150642 |
| 4                | 1                | 0              | 1.609180                | -0.590860 | -1.202613 |
| 5                | 6                | 0              | 2.088590                | -2.204921 | 0.040978  |
| 6                | 8                | 0              | 2.908968                | -2.848768 | -0.562816 |
| 7                | 7                | 0              | 0.799628                | -0.155287 | 0.631821  |
| 8                | 7                | 0              | -0.882725               | 1.128225  | 2.291698  |
| 9                | 1                | 0              | -0.693875               | 2.089350  | 2.020474  |
| 10               | 6                | 0              | -1.515723               | 0.378262  | 1.196259  |
| 11               | 1                | 0              | -1.891253               | -0.556784 | 1.626952  |
| 12               | 6                | 0              | -2.687246               | 1.109164  | 0.527420  |
| 13               | 6                | 0              | -0.464696               | -0.048647 | 0.153571  |
| 14               | 1                | 0              | -3.366825               | 1.476981  | 1.294215  |
| 15               | 1                | 0              | -2.329667               | 1.952912  | -0.064337 |
| 16               | 8                | 0              | -0.776405               | -0.282973 | -1.006669 |
| 17               | 1                | 0              | -5.054093               | 0.289782  | -0.027659 |
| 18               | 1                | 0              | -1.482520               | 1.153946  | 3.108883  |
| 19               | 1                | 0              | 0.923170                | 0.052420  | 1.614729  |
| 20               | 8                | 0              | 1.253886                | -2.752114 | 0.951257  |
| 21               | 1                | 0              | 1.444082                | -3.702700 | 0.970100  |
| 22               | 34               | 0              | -3.771061               | -0.056606 | -0.675445 |
| 23               | 6                | 0              | 3.447585                | 1.330896  | -0.723192 |
| 24               | 1                | 0              | 3.368948                | 1.052313  | -1.782339 |
| 25               | 1                | 0              | 3.316872                | 0.266427  | 1.168883  |
| 26               | 6                | 0              | 2.414647                | 2.432471  | -0.449390 |
| 27               | 6                | 0              | 4.871119                | 1.854339  | -0.482128 |

|    |   |   |          |          |           |
|----|---|---|----------|----------|-----------|
| 28 | 1 | 0 | 5.074957 | 2.733130 | -1.100194 |
| 29 | 1 | 0 | 5.009079 | 2.146813 | 0.564800  |
| 30 | 1 | 0 | 5.622933 | 1.096101 | -0.719146 |
| 31 | 1 | 0 | 1.402221 | 2.119842 | -0.710174 |
| 32 | 1 | 0 | 2.420272 | 2.720551 | 0.608033  |
| 33 | 1 | 0 | 2.647034 | 3.325597 | -1.036823 |

### Sec-Leu (aqueous phase)

| Center<br>Number | Atomic<br>Number | Atomic<br>Type | Coordinates (Angstroms) |           |           |
|------------------|------------------|----------------|-------------------------|-----------|-----------|
|                  |                  |                | X                       | Y         | Z         |
| 1                | 6                | 0              | 3.256575                | -0.107146 | 0.103042  |
| 2                | 1                | 0              | 3.984978                | -0.903152 | -0.072697 |
| 3                | 6                | 0              | 1.853324                | -0.696352 | -0.175676 |
| 4                | 1                | 0              | 1.661368                | -0.674020 | -1.251138 |
| 5                | 6                | 0              | 1.851529                | -2.184674 | 0.188003  |
| 6                | 8                | 0              | 2.300386                | -3.042767 | -0.537845 |
| 7                | 7                | 0              | 0.805782                | 0.049517  | 0.495343  |
| 8                | 7                | 0              | -0.766175               | 1.787229  | 1.784576  |
| 9                | 1                | 0              | -0.603111               | 2.612038  | 1.212740  |
| 10               | 6                | 0              | -1.472108               | 0.747501  | 1.026576  |
| 11               | 1                | 0              | -1.859777               | 0.026793  | 1.754974  |
| 12               | 6                | 0              | -2.650457               | 1.290093  | 0.204728  |
| 13               | 6                | 0              | -0.492484               | -0.051119 | 0.149721  |
| 14               | 1                | 0              | -3.278842               | 1.901417  | 0.848265  |
| 15               | 1                | 0              | -2.296218               | 1.897882  | -0.628124 |
| 16               | 8                | 0              | -0.889852               | -0.753653 | -0.782525 |
| 17               | 1                | 0              | -5.094744               | 0.544135  | -0.124317 |
| 18               | 1                | 0              | -1.317658               | 2.081389  | 2.583482  |
| 19               | 1                | 0              | 1.012129                | 0.632691  | 1.297672  |
| 20               | 8                | 0              | 1.345071                | -2.442392 | 1.404245  |
| 21               | 1                | 0              | 1.408799                | -3.398025 | 1.564272  |
| 22               | 34               | 0              | -3.847009               | -0.129331 | -0.535239 |
| 23               | 6                | 0              | 3.662610                | 1.099323  | -0.768435 |
| 24               | 1                | 0              | 3.558551                | 0.789233  | -1.816222 |
| 25               | 1                | 0              | 3.331035                | 0.150588  | 1.166676  |
| 26               | 6                | 0              | 2.793481                | 2.346366  | -0.554999 |
| 27               | 6                | 0              | 5.142827                | 1.427310  | -0.521869 |
| 28               | 1                | 0              | 5.471150                | 2.246379  | -1.167700 |
| 29               | 1                | 0              | 5.307171                | 1.735339  | 0.516489  |
| 30               | 1                | 0              | 5.783228                | 0.563210  | -0.721254 |
| 31               | 1                | 0              | 1.748246                | 2.170417  | -0.815187 |
| 32               | 1                | 0              | 2.831058                | 2.676283  | 0.489216  |
| 33               | 1                | 0              | 3.157088                | 3.170106  | -1.176017 |

### Sec-Asp (gas phase)

| Center<br>Number | Atomic<br>Number | Atomic<br>Type | Coordinates (Angstroms) |   |   |
|------------------|------------------|----------------|-------------------------|---|---|
|                  |                  |                | X                       | Y | Z |

|    |    |   |           |           |           |
|----|----|---|-----------|-----------|-----------|
| 1  | 6  | 0 | 3.005351  | 0.842644  | -0.030494 |
| 2  | 6  | 0 | 2.174162  | -0.442387 | -0.255588 |
| 3  | 1  | 0 | 1.775318  | -0.450305 | -1.276103 |
| 4  | 6  | 0 | 3.071284  | -1.676739 | -0.130647 |
| 5  | 8  | 0 | 4.270871  | -1.647809 | -0.018320 |
| 6  | 7  | 0 | 1.023598  | -0.520494 | 0.617134  |
| 7  | 7  | 0 | -0.666219 | 0.430375  | 2.472385  |
| 8  | 1  | 0 | -0.425742 | 1.408642  | 2.330499  |
| 9  | 6  | 0 | -1.292383 | -0.145217 | 1.274067  |
| 10 | 1  | 0 | -1.589533 | -1.169774 | 1.524731  |
| 11 | 6  | 0 | -2.527606 | 0.612327  | 0.771282  |
| 12 | 6  | 0 | -0.234864 | -0.259281 | 0.160658  |
| 13 | 1  | 0 | -3.217494 | 0.771447  | 1.598246  |
| 14 | 1  | 0 | -2.246024 | 1.578890  | 0.353668  |
| 15 | 8  | 0 | -0.512401 | -0.132356 | -1.021594 |
| 16 | 1  | 0 | -4.799500 | -0.409433 | 0.139196  |
| 17 | 1  | 0 | -1.279871 | 0.365069  | 3.276638  |
| 18 | 1  | 0 | 1.142566  | -0.428163 | 1.620162  |
| 19 | 8  | 0 | 2.361263  | -2.819478 | -0.193178 |
| 20 | 1  | 0 | 2.991307  | -3.554194 | -0.139582 |
| 21 | 34 | 0 | -3.542564 | -0.373588 | -0.634675 |
| 22 | 1  | 0 | 3.376407  | 0.864287  | 0.995598  |
| 23 | 1  | 0 | 3.858287  | 0.840988  | -0.707787 |
| 24 | 6  | 0 | 2.156733  | 2.072880  | -0.252673 |
| 25 | 8  | 0 | 1.439082  | 2.583043  | 0.575031  |
| 26 | 8  | 0 | 2.265153  | 2.541888  | -1.514213 |
| 27 | 1  | 0 | 1.652000  | 3.287709  | -1.604389 |

# Sec-Asp (aqueous phase)

| Center<br>Number | Atomic<br>Number | Atomic<br>Type | Coordinates (Angstroms) |           |           |
|------------------|------------------|----------------|-------------------------|-----------|-----------|
|                  |                  |                | X                       | Y         | Z         |
| 1                | 6                | 0              | 3.268161                | 0.419955  | 0.014196  |
| 2                | 6                | 0              | 2.087682                | -0.540585 | -0.205345 |
| 3                | 1                | 0              | 1.748672                | -0.467112 | -1.242782 |
| 4                | 6                | 0              | 2.560248                | -1.993280 | -0.049301 |
| 5                | 8                | 0              | 3.624770                | -2.390721 | -0.462365 |
| 6                | 7                | 0              | 0.957168                | -0.195451 | 0.627674  |
| 7                | 7                | 0              | -0.759363               | 0.781547  | 2.421868  |
| 8                | 1                | 0              | -0.639839               | 1.778627  | 2.262505  |
| 9                | 6                | 0              | -1.372943               | 0.126984  | 1.260858  |
| 10               | 1                | 0              | -1.719323               | -0.856934 | 1.596168  |
| 11               | 6                | 0              | -2.570880               | 0.895170  | 0.685484  |
| 12               | 6                | 0              | -0.318406               | -0.166597 | 0.178743  |
| 13               | 1                | 0              | -3.253829               | 1.145170  | 1.493996  |
| 14               | 1                | 0              | -2.246534               | 1.813698  | 0.196438  |
| 15               | 8                | 0              | -0.637480               | -0.384924 | -0.989044 |
| 16               | 1                | 0              | -4.944546               | 0.177905  | -0.017301 |
| 17               | 1                | 0              | -1.347266               | 0.676293  | 3.241707  |
| 18               | 1                | 0              | 1.077200                | -0.012946 | 1.618866  |

|    |    |   |           |           |           |
|----|----|---|-----------|-----------|-----------|
| 19 | 8  | 0 | 1.657290  | -2.780534 | 0.549042  |
| 20 | 1  | 0 | 2.008243  | -3.685882 | 0.571011  |
| 21 | 34 | 0 | -3.644596 | -0.155472 | -0.631592 |
| 22 | 1  | 0 | 3.589299  | 0.413996  | 1.056567  |
| 23 | 1  | 0 | 4.110794  | 0.081822  | -0.594390 |
| 24 | 6  | 0 | 2.969753  | 1.851513  | -0.368953 |
| 25 | 8  | 0 | 3.259031  | 2.817149  | 0.299920  |
| 26 | 8  | 0 | 2.369303  | 1.948123  | -1.570123 |
| 27 | 1  | 0 | 2.223753  | 2.887026  | -1.768972 |

### Sec-Ser (gas phase)

| Center<br>Number | Atomic<br>Number | Atomic<br>Type | Coordinates (Angstroms) |           |           |
|------------------|------------------|----------------|-------------------------|-----------|-----------|
|                  |                  |                | X                       | Y         | Z         |
| 1                | 6                | 0              | 2.889395                | -0.408555 | -1.459645 |
| 2                | 1                | 0              | 3.198114                | 0.612811  | -1.714069 |
| 3                | 6                | 0              | 2.226573                | -0.411730 | -0.075354 |
| 4                | 1                | 0              | 1.851824                | -1.410394 | 0.143652  |
| 5                | 6                | 0              | 3.219220                | -0.049952 | 1.026998  |
| 6                | 8                | 0              | 3.546162                | -0.757019 | 1.939198  |
| 7                | 7                | 0              | 1.101689                | 0.509878  | -0.037100 |
| 8                | 7                | 0              | -0.674401               | 2.498653  | -0.475175 |
| 9                | 1                | 0              | -0.689703               | 2.550728  | -1.490128 |
| 10               | 6                | 0              | -1.231600               | 1.224346  | 0.003154  |
| 11               | 1                | 0              | -1.391834               | 1.333620  | 1.081540  |
| 12               | 6                | 0              | -2.562386               | 0.828258  | -0.648249 |
| 13               | 6                | 0              | -0.189845               | 0.096712  | -0.147975 |
| 14               | 1                | 0              | -3.246456               | 1.674614  | -0.617269 |
| 15               | 1                | 0              | -2.411936               | 0.531212  | -1.686860 |
| 16               | 8                | 0              | -0.522312               | -1.066028 | -0.318637 |
| 17               | 1                | 0              | -4.729879               | 0.078807  | 0.499404  |
| 18               | 1                | 0              | -1.207990               | 3.285256  | -0.121897 |
| 19               | 1                | 0              | 1.258518                | 1.509414  | 0.009854  |
| 20               | 8                | 0              | 3.687111                | 1.216992  | 0.864992  |
| 21               | 1                | 0              | 4.300220                | 1.394789  | 1.594046  |
| 22               | 34               | 0              | -3.481339               | -0.679748 | 0.277933  |
| 23               | 1                | 0              | 2.144965                | -0.749243 | -2.188633 |
| 24               | 8                | 0              | 4.006742                | -1.286178 | -1.399751 |
| 25               | 1                | 0              | 4.448909                | -1.296515 | -2.253429 |

### Sec-Ser (aqueous phase)

| Center<br>Number | Atomic<br>Number | Atomic<br>Type | Coordinates (Angstroms) |           |           |
|------------------|------------------|----------------|-------------------------|-----------|-----------|
|                  |                  |                | X                       | Y         | Z         |
| 1                | 6                | 0              | 3.031419                | 0.133591  | -1.492741 |
| 2                | 1                | 0              | 3.354127                | 1.171866  | -1.362087 |
| 3                | 6                | 0              | 2.247207                | -0.329291 | -0.257792 |
| 4                | 1                | 0              | 1.872708                | -1.338541 | -0.420610 |

|    |    |   |           |           |           |
|----|----|---|-----------|-----------|-----------|
| 5  | 6  | 0 | 3.142489  | -0.382748 | 0.981445  |
| 6  | 8  | 0 | 3.436413  | -1.390791 | 1.577448  |
| 7  | 7  | 0 | 1.104011  | 0.533973  | -0.024159 |
| 8  | 7  | 0 | -0.665237 | 2.527341  | 0.076913  |
| 9  | 1  | 0 | -0.703866 | 2.797700  | -0.902695 |
| 10 | 6  | 0 | -1.222297 | 1.184647  | 0.279768  |
| 11 | 1  | 0 | -1.409925 | 1.074817  | 1.353468  |
| 12 | 6  | 0 | -2.539698 | 0.950850  | -0.472013 |
| 13 | 6  | 0 | -0.178458 | 0.103887  | -0.059834 |
| 14 | 1  | 0 | -3.219754 | 1.772196  | -0.258661 |
| 15 | 1  | 0 | -2.370746 | 0.899091  | -1.547650 |
| 16 | 8  | 0 | -0.510423 | -1.054386 | -0.305733 |
| 17 | 1  | 0 | -4.809898 | -0.046352 | 0.228448  |
| 18 | 1  | 0 | -1.195251 | 3.216170  | 0.599800  |
| 19 | 1  | 0 | 1.231238  | 1.523035  | 0.165013  |
| 20 | 8  | 0 | 3.566045  | 0.842632  | 1.339653  |
| 21 | 1  | 0 | 4.117541  | 0.766341  | 2.134951  |
| 22 | 34 | 0 | -3.501568 | -0.711594 | 0.078894  |
| 23 | 1  | 0 | 2.366741  | 0.077258  | -2.361004 |
| 24 | 8  | 0 | 4.152714  | -0.735504 | -1.636368 |
| 25 | 1  | 0 | 4.707004  | -0.409825 | -2.353640 |

# Sec-Gln (gas phase)

| Center<br>Number | Atomic<br>Number | Atomic<br>Type | Coordinates (Angstroms) |           |           |
|------------------|------------------|----------------|-------------------------|-----------|-----------|
|                  |                  |                | X                       | Y         | Z         |
| 1                | 6                | 0              | -2.660443               | -0.444646 | 0.144904  |
| 2                | 1                | 0              | -2.909601               | -0.544126 | 1.206916  |
| 3                | 6                | 0              | -1.358627               | 0.370763  | -0.009863 |
| 4                | 1                | 0              | -1.166630               | 0.563743  | -1.068019 |
| 5                | 6                | 0              | -1.508779               | 1.756284  | 0.626096  |
| 6                | 8                | 0              | -2.141474               | 2.654898  | 0.128992  |
| 7                | 7                | 0              | -0.239137               | -0.386170 | 0.510569  |
| 8                | 7                | 0              | 1.511504                | -2.188721 | 1.451547  |
| 9                | 1                | 0              | 1.358950                | -2.930489 | 0.773719  |
| 10               | 6                | 0              | 2.105880                | -1.000030 | 0.823697  |
| 11               | 1                | 0              | 2.450193                | -0.349386 | 1.635407  |
| 12               | 6                | 0              | 3.298711                | -1.301310 | -0.094480 |
| 13               | 6                | 0              | 1.031318                | -0.186292 | 0.078907  |
| 14               | 1                | 0              | 3.994864                | -1.957091 | 0.425523  |
| 15               | 1                | 0              | 2.967148                | -1.791612 | -1.010893 |
| 16               | 8                | 0              | 1.324855                | 0.591362  | -0.818864 |
| 17               | 1                | 0              | 5.634224                | -0.250126 | -0.203233 |
| 18               | 1                | 0              | 2.113800                | -2.557552 | 2.178994  |
| 19               | 1                | 0              | -0.359080               | -1.028573 | 1.283753  |
| 20               | 8                | 0              | -0.901921               | 1.865085  | 1.827202  |
| 21               | 1                | 0              | -1.061504               | 2.767271  | 2.144454  |
| 22               | 34               | 0              | 4.335090                | 0.322080  | -0.614739 |
| 23               | 1                | 0              | -2.462662               | -1.454060 | -0.220638 |
| 24               | 6                | 0              | -5.074319               | -0.783069 | -0.532546 |
| 25               | 8                | 0              | -5.001309               | -1.966602 | -0.250079 |

|    |   |   |           |           |           |
|----|---|---|-----------|-----------|-----------|
| 26 | 7 | 0 | -6.264273 | -0.175568 | -0.817522 |
| 27 | 1 | 0 | -7.098870 | -0.740430 | -0.845843 |
| 28 | 1 | 0 | -6.324942 | 0.796695  | -1.069792 |
| 29 | 6 | 0 | -3.853863 | 0.130218  | -0.618413 |
| 30 | 1 | 0 | -3.600255 | 0.234852  | -1.680511 |
| 31 | 1 | 0 | -4.105834 | 1.133897  | -0.268685 |

### Sec-Gln (aqueous phase)

| Center<br>Number | Atomic<br>Number | Atomic<br>Type | Coordinates (Angstroms) |           |           |
|------------------|------------------|----------------|-------------------------|-----------|-----------|
|                  |                  |                | X                       | Y         | Z         |
| 1                | 6                | 0              | -2.697873               | -0.460932 | 0.095324  |
| 2                | 1                | 0              | -2.827400               | -0.568846 | 1.176703  |
| 3                | 6                | 0              | -1.372095               | 0.273551  | -0.188243 |
| 4                | 1                | 0              | -1.267384               | 0.431839  | -1.264340 |
| 5                | 6                | 0              | -1.380232               | 1.675743  | 0.426757  |
| 6                | 8                | 0              | -1.744121               | 2.664188  | -0.168295 |
| 7                | 7                | 0              | -0.265112               | -0.537641 | 0.284799  |
| 8                | 7                | 0              | 1.451609                | -2.491693 | 0.928357  |
| 9                | 1                | 0              | 1.374290                | -3.065765 | 0.092488  |
| 10               | 6                | 0              | 2.060178                | -1.191120 | 0.625008  |
| 11               | 1                | 0              | 2.338862                | -0.738042 | 1.582920  |
| 12               | 6                | 0              | 3.317653                | -1.289816 | -0.249936 |
| 13               | 6                | 0              | 1.020204                | -0.238205 | 0.011723  |
| 14               | 1                | 0              | 3.990655                | -2.029769 | 0.176907  |
| 15               | 1                | 0              | 3.063125                | -1.585150 | -1.267800 |
| 16               | 8                | 0              | 1.351776                | 0.746960  | -0.650390 |
| 17               | 1                | 0              | 5.659910                | -0.229479 | -0.043249 |
| 18               | 1                | 0              | 2.020669                | -3.004534 | 1.593388  |
| 19               | 1                | 0              | -0.427634               | -1.373288 | 0.834499  |
| 20               | 8                | 0              | -0.997410               | 1.689597  | 1.713718  |
| 21               | 1                | 0              | -1.064410               | 2.600321  | 2.043403  |
| 22               | 34               | 0              | 4.365121                | 0.408539  | -0.350167 |
| 23               | 1                | 0              | -2.608090               | -1.466242 | -0.321193 |
| 24               | 6                | 0              | -5.177851               | -0.642020 | -0.385595 |
| 25               | 8                | 0              | -5.140171               | -1.870685 | -0.433798 |
| 26               | 7                | 0              | -6.337406               | 0.039587  | -0.242072 |
| 27               | 1                | 0              | -7.210227               | -0.466636 | -0.214091 |
| 28               | 1                | 0              | -6.367685               | 1.046045  | -0.208198 |
| 29               | 6                | 0              | -3.924672               | 0.217643  | -0.517228 |
| 30               | 1                | 0              | -3.766104               | 0.375409  | -1.590540 |
| 31               | 1                | 0              | -4.098807               | 1.202490  | -0.079517 |

### Sec-His (gas phase)

| Center<br>Number | Atomic<br>Number | Atomic<br>Type | Coordinates (Angstroms) |          |          |
|------------------|------------------|----------------|-------------------------|----------|----------|
|                  |                  |                | X                       | Y        | Z        |
| 1                | 7                | 0              | 2.014412                | 2.032728 | 1.610253 |



|    |    |   |           |           |           |
|----|----|---|-----------|-----------|-----------|
| 2  | 1  | 0 | 1.892414  | 1.606634  | 2.525007  |
| 3  | 6  | 0 | 2.411701  | 1.033827  | 0.605702  |
| 4  | 1  | 0 | 2.748514  | 1.588573  | -0.277026 |
| 5  | 6  | 0 | 3.541581  | 0.098520  | 1.052439  |
| 6  | 6  | 0 | 1.181324  | 0.227149  | 0.141843  |
| 7  | 1  | 0 | 4.356220  | 0.688865  | 1.468336  |
| 8  | 1  | 0 | 3.188334  | -0.602292 | 1.809875  |
| 9  | 8  | 0 | 1.277507  | -0.926934 | -0.245470 |
| 10 | 1  | 0 | 5.697406  | -0.493272 | -0.206240 |
| 11 | 1  | 0 | 2.719623  | 2.755445  | 1.703796  |
| 12 | 34 | 0 | 4.319820  | -0.974520 | -0.437445 |
| 13 | 7  | 0 | 0.013251  | 0.924992  | 0.171360  |
| 14 | 1  | 0 | 0.041783  | 1.838794  | 0.607795  |
| 15 | 6  | 0 | -1.251245 | 0.365667  | -0.284982 |
| 16 | 1  | 0 | -1.011586 | -0.512075 | -0.883804 |
| 17 | 6  | 0 | -2.147841 | -0.030126 | 0.905912  |
| 18 | 6  | 0 | -1.913347 | 1.376931  | -1.220338 |
| 19 | 1  | 0 | -1.569956 | -0.739977 | 1.509289  |
| 20 | 1  | 0 | -2.311778 | 0.858473  | 1.525654  |
| 21 | 6  | 0 | -3.464368 | -0.625643 | 0.510620  |
| 22 | 8  | 0 | -2.254093 | 2.511584  | -0.554729 |
| 23 | 8  | 0 | -2.093547 | 1.229094  | -2.398092 |
| 24 | 7  | 0 | -4.518096 | -0.720372 | 1.403708  |
| 25 | 6  | 0 | -3.942170 | -1.196483 | -0.644716 |
| 26 | 1  | 0 | -4.518569 | -0.396220 | 2.358245  |
| 27 | 6  | 0 | -5.555962 | -1.332861 | 0.755780  |
| 28 | 7  | 0 | -5.240761 | -1.630085 | -0.480060 |
| 29 | 1  | 0 | -3.432632 | -1.312763 | -1.588180 |
| 30 | 1  | 0 | -6.503233 | -1.527599 | 1.235593  |
| 31 | 1  | 0 | -2.649017 | 3.118420  | -1.199261 |

# Sec-His (aqueous phase)

| Center<br>Number | Atomic<br>Number | Atomic<br>Type | Coordinates (Angstroms) |           |           |
|------------------|------------------|----------------|-------------------------|-----------|-----------|
|                  |                  |                | X                       | Y         | Z         |
| 1                | 7                | 0              | 1.939827                | 2.018046  | 1.628161  |
| 2                | 1                | 0              | 1.867632                | 1.577957  | 2.542024  |
| 3                | 6                | 0              | 2.381784                | 1.057609  | 0.610359  |
| 4                | 1                | 0              | 2.690476                | 1.639937  | -0.264892 |
| 5                | 6                | 0              | 3.563663                | 0.187503  | 1.057994  |
| 6                | 6                | 0              | 1.199482                | 0.196353  | 0.126315  |
| 7                | 1                | 0              | 4.345421                | 0.828116  | 1.459132  |
| 8                | 1                | 0              | 3.256856                | -0.522805 | 1.825672  |
| 9                | 8                | 0              | 1.375191                | -0.900448 | -0.400870 |
| 10               | 1                | 0              | 5.785903                | -0.417517 | -0.101212 |
| 11               | 1                | 0              | 2.605038                | 2.779191  | 1.713044  |
| 12               | 34               | 0              | 4.411861                | -0.845997 | -0.426320 |
| 13               | 7                | 0              | -0.014965               | 0.768876  | 0.298920  |
| 14               | 1                | 0              | -0.015373               | 1.657149  | 0.790153  |
| 15               | 6                | 0              | -1.266214               | 0.153690  | -0.114984 |
| 16               | 1                | 0              | -1.031764               | -0.850236 | -0.464614 |

|    |   |   |           |           |           |
|----|---|---|-----------|-----------|-----------|
| 17 | 6 | 0 | -2.258674 | 0.085734  | 1.070761  |
| 18 | 6 | 0 | -1.813142 | 0.913462  | -1.326975 |
| 19 | 1 | 0 | -1.790255 | -0.531894 | 1.839625  |
| 20 | 1 | 0 | -2.380567 | 1.086717  | 1.494126  |
| 21 | 6 | 0 | -3.593194 | -0.496211 | 0.727839  |
| 22 | 8 | 0 | -2.297650 | 2.123706  | -0.985849 |
| 23 | 8 | 0 | -1.798318 | 0.500904  | -2.461549 |
| 24 | 7 | 0 | -4.643773 | 0.248600  | 0.224166  |
| 25 | 6 | 0 | -4.083307 | -1.778412 | 0.799541  |
| 26 | 1 | 0 | -4.636555 | 1.243825  | 0.050470  |
| 27 | 6 | 0 | -5.693810 | -0.592245 | 0.021503  |
| 28 | 7 | 0 | -5.389921 | -1.829900 | 0.358867  |
| 29 | 1 | 0 | -3.566564 | -2.659646 | 1.148683  |
| 30 | 1 | 0 | -6.641484 | -0.250674 | -0.365422 |
| 31 | 1 | 0 | -2.583548 | 2.586226  | -1.790675 |

# Sec-Pyl (gas phase)

| Center<br>Number | Atomic<br>Number | Atomic<br>Type | Coordinates (Angstroms) |           |           |
|------------------|------------------|----------------|-------------------------|-----------|-----------|
|                  |                  |                | X                       | Y         | Z         |
| 1                | 6                | 0              | -7.579984               | -0.266790 | -1.400796 |
| 2                | 6                | 0              | -5.968700               | -0.066563 | 0.136175  |
| 3                | 6                | 0              | -6.793340               | -1.308557 | 0.583499  |
| 4                | 6                | 0              | -8.049256               | -1.199930 | -0.313632 |
| 5                | 1                | 0              | -6.140291               | 0.771405  | 0.826396  |
| 6                | 1                | 0              | -6.232711               | -2.202102 | 0.290635  |
| 7                | 1                | 0              | -8.398468               | -2.159496 | -0.705053 |
| 8                | 1                | 0              | -8.897121               | -0.748487 | 0.219725  |
| 9                | 7                | 0              | -6.484824               | 0.343417  | -1.185424 |
| 10               | 1                | 0              | -8.136737               | -0.089662 | -2.319873 |
| 11               | 6                | 0              | -7.069479               | -1.378906 | 2.083943  |
| 12               | 1                | 0              | -6.131420               | -1.424184 | 2.639873  |
| 13               | 1                | 0              | -7.627637               | -0.498572 | 2.421210  |
| 14               | 1                | 0              | -7.659809               | -2.265279 | 2.334598  |
| 15               | 6                | 0              | -4.454475               | -0.296124 | 0.141132  |
| 16               | 8                | 0              | -3.904783               | -0.835510 | 1.094714  |
| 17               | 7                | 0              | -3.802058               | 0.149029  | -0.959151 |
| 18               | 1                | 0              | -4.369345               | 0.587870  | -1.672377 |
| 19               | 6                | 0              | -2.354860               | 0.068917  | -1.103348 |
| 20               | 1                | 0              | -2.021868               | -0.826784 | -0.574529 |
| 21               | 1                | 0              | -2.126732               | -0.065861 | -2.164821 |
| 22               | 6                | 0              | -1.622066               | 1.299092  | -0.551864 |
| 23               | 1                | 0              | -1.968964               | 2.194427  | -1.081426 |
| 24               | 1                | 0              | -1.900727               | 1.424093  | 0.499738  |
| 25               | 6                | 0              | -0.100415               | 1.173257  | -0.677035 |
| 26               | 1                | 0              | 0.177103                | 1.032315  | -1.728544 |
| 27               | 1                | 0              | 0.232280                | 0.273273  | -0.148851 |
| 28               | 6                | 0              | 0.638137                | 2.395100  | -0.123912 |
| 29               | 1                | 0              | 0.356244                | 3.288900  | -0.687780 |
| 30               | 1                | 0              | 0.344357                | 2.569427  | 0.918692  |
| 31               | 6                | 0              | 2.177805                | 2.257410  | -0.194441 |

|    |    |   |          |           |           |
|----|----|---|----------|-----------|-----------|
| 32 | 1  | 0 | 2.465883 | 2.016259  | -1.220133 |
| 33 | 6  | 0 | 2.810467 | 3.610934  | 0.118813  |
| 34 | 8  | 0 | 2.739976 | 4.567403  | -0.609594 |
| 35 | 7  | 0 | 2.684060 | 1.186751  | 0.641137  |
| 36 | 7  | 0 | 3.109261 | -0.767335 | 2.446870  |
| 37 | 1  | 0 | 2.240574 | -1.288958 | 2.366622  |
| 38 | 6  | 0 | 3.902963 | -0.849584 | 1.212302  |
| 39 | 1  | 0 | 4.900143 | -0.462843 | 1.451018  |
| 40 | 6  | 0 | 4.056309 | -2.268717 | 0.649759  |
| 41 | 6  | 0 | 3.337684 | 0.106764  | 0.142600  |
| 42 | 1  | 0 | 4.364788 | -2.942278 | 1.447402  |
| 43 | 1  | 0 | 3.113943 | -2.623502 | 0.230653  |
| 44 | 8  | 0 | 3.504243 | -0.103487 | -1.051356 |
| 45 | 1  | 0 | 6.183707 | -3.493132 | -0.098420 |
| 46 | 1  | 0 | 3.621098 | -1.146071 | 3.235950  |
| 47 | 1  | 0 | 2.604473 | 1.237186  | 1.649253  |
| 48 | 8  | 0 | 3.423643 | 3.652576  | 1.325601  |
| 49 | 1  | 0 | 3.763573 | 4.553311  | 1.440256  |
| 50 | 34 | 0 | 5.441448 | -2.411764 | -0.778480 |

#### Sec-Pyl (aqueous phase)

| Center<br>Number | Atomic<br>Number | Atomic<br>Type | Coordinates (Angstroms) |           |           |
|------------------|------------------|----------------|-------------------------|-----------|-----------|
|                  |                  |                | X                       | Y         | Z         |
| 1                | 6                | 0              | -7.868806               | 0.294671  | -1.334473 |
| 2                | 6                | 0              | -6.322377               | -0.113853 | 0.233736  |
| 3                | 6                | 0              | -7.232821               | -1.381432 | 0.225943  |
| 4                | 6                | 0              | -8.424086               | -0.921730 | -0.647800 |
| 5                | 1                | 0              | -6.476270               | 0.455031  | 1.160253  |
| 6                | 1                | 0              | -6.701588               | -2.177063 | -0.305920 |
| 7                | 1                | 0              | -8.769314               | -1.677858 | -1.357366 |
| 8                | 1                | 0              | -9.293414               | -0.634066 | -0.042110 |
| 9                | 7                | 0              | -6.761407               | 0.740664  | -0.889573 |
| 10               | 1                | 0              | -8.376216               | 0.797460  | -2.155719 |
| 11               | 6                | 0              | -7.623271               | -1.891343 | 1.612359  |
| 12               | 1                | 0              | -6.739859               | -2.184062 | 2.183292  |
| 13               | 1                | 0              | -8.153687               | -1.116971 | 2.176158  |
| 14               | 1                | 0              | -8.281592               | -2.761367 | 1.535253  |
| 15               | 6                | 0              | -4.826297               | -0.431535 | 0.189568  |
| 16               | 8                | 0              | -4.326565               | -1.206056 | 1.010939  |
| 17               | 7                | 0              | -4.129930               | 0.183498  | -0.785984 |
| 18               | 1                | 0              | -4.652180               | 0.821040  | -1.373557 |
| 19               | 6                | 0              | -2.690532               | 0.043609  | -0.974339 |
| 20               | 1                | 0              | -2.398562               | -0.931395 | -0.580348 |
| 21               | 1                | 0              | -2.492207               | 0.041963  | -2.049617 |
| 22               | 6                | 0              | -1.882831               | 1.154130  | -0.290153 |
| 23               | 1                | 0              | -2.211781               | 2.126317  | -0.674493 |
| 24               | 1                | 0              | -2.104656               | 1.144749  | 0.782471  |
| 25               | 6                | 0              | -0.375469               | 0.991141  | -0.512098 |
| 26               | 1                | 0              | -0.160016               | 0.999887  | -1.587333 |
| 27               | 1                | 0              | -0.057468               | 0.012195  | -0.138378 |

|    |    |   |          |           |           |
|----|----|---|----------|-----------|-----------|
| 28 | 6  | 0 | 0.436770 | 2.098523  | 0.168629  |
| 29 | 1  | 0 | 0.129375 | 3.071815  | -0.222420 |
| 30 | 1  | 0 | 0.232970 | 2.110025  | 1.245774  |
| 31 | 6  | 0 | 1.957303 | 1.960487  | -0.054137 |
| 32 | 1  | 0 | 2.156168 | 1.882286  | -1.125440 |
| 33 | 6  | 0 | 2.656612 | 3.249598  | 0.386527  |
| 34 | 8  | 0 | 2.601008 | 4.277826  | -0.249491 |
| 35 | 7  | 0 | 2.475795 | 0.767966  | 0.584622  |
| 36 | 7  | 0 | 2.894489 | -1.540200 | 1.860483  |
| 37 | 1  | 0 | 2.249958 | -2.132514 | 1.343113  |
| 38 | 6  | 0 | 4.000092 | -1.088245 | 1.007585  |
| 39 | 1  | 0 | 4.783218 | -0.707669 | 1.672564  |
| 40 | 6  | 0 | 4.596477 | -2.208657 | 0.143283  |
| 41 | 6  | 0 | 3.574038 | 0.117419  | 0.151117  |
| 42 | 1  | 0 | 4.817400 | -3.064586 | 0.776720  |
| 43 | 1  | 0 | 3.896470 | -2.513114 | -0.635041 |
| 44 | 8  | 0 | 4.221801 | 0.460633  | -0.839766 |
| 45 | 1  | 0 | 6.997628 | -2.984531 | -0.373480 |
| 46 | 1  | 0 | 3.245853 | -2.087603 | 2.638778  |
| 47 | 1  | 0 | 2.050034 | 0.403717  | 1.429803  |
| 48 | 8  | 0 | 3.308088 | 3.142231  | 1.554943  |
| 49 | 1  | 0 | 3.698887 | 4.005819  | 1.766220  |
| 50 | 34 | 0 | 6.322786 | -1.723434 | -0.738926 |

---
